# Supplementary material for: Block HSIC Lasso: model-free biomarker detection for ultra-high dimensional data
Source: Oxford University Press journal article supplement (doi:10.1093/bioinformatics/btz333), 2019-05-09
Supplement: bioinformatics_35_14_i427_s5.zip [file bioinformatics_35_14_i427_s5.zip]

Archive with 3 entries (3 files):
- Climente-Gonzalez.11.sup.2.pdf
- Climente-Gonzalez.11.sup.3.xlsx
- Climente-Gonzalez.11.sup.1.pdf
